# Supplementary material for: Precise isotope analysis of tellurium by inductively coupled plasma mass spectrometry using a double spike method
Source: Royal Society of Chemistry journal article supplement (doi:10.1039/c8ja00010g), 2018-01-01
Supplement: c8ja00010g1.pdf [file c8ja00010g1.pdf]

Electronic Supplementary Information

# Precise isotope analysis of tellurium by an inductively coupled plasma mass spectrometry using a double spike method

Yusuke Fukami<sup>\*a</sup>, Jun-Ichi Kimura<sup>b</sup>, and Katsuhiko Suzuki<sup>a</sup>

<sup>a</sup> Ore Genesis Research Unit, Project Team for Development of New-generation Research Protocol for Submarine Resources, Japan Agency for Marine-Earth Science and Technology, 2-15 Natsushima-cho, Yokosuka, 237-0061, Japan, E-mail: fukamiy@jamstec.go.jp

<sup>b</sup> Department of Solid Earth Geochemistry, Japan Agency for Marine-Earth Science and Technology, 2-15 Natsushima-cho, Yokosuka, 237-0061, Japan

Table S1. Normalised Te isotope compositions of unspiked samples.

| Sample                                         | $\delta^{126/125}\text{Te}_N^a$ | $\delta^{130/125}\text{Te}_N^a$ |
|------------------------------------------------|---------------------------------|---------------------------------|
| <b>NOD A-1 (Fe-Mn nodule, Atlantic ocean)</b>  | 0.02 ± 0.05                     | 0.02 ± 0.03                     |
| <b>NOD P-1 (Fe-Mn nodule, Pacific ocean)</b>   | 0.02 ± 0.04                     | 0.01 ± 0.03                     |
| <b>JMn-1 (Fe-Mn nodule, Pacific ocean)</b>     | 0.00 ± 0.04                     | 0.02 ± 0.04                     |
| <b>GXR-1 (jasperoid, Drum mountains, Utah)</b> | 0.00 ± 0.04                     | 0.01 ± 0.03                     |

Uncertainties are given by two-standard deviation (2SD) calculated from 5 blocks in one run.

The 2SD of  $\delta^{126/125}\text{Te}_N$  and  $\delta^{130/125}\text{Te}_N$  for standard analyses are 0.05 and 0.03, respectively (n = 5).

Mass fractionation was corrected by normalising  $^{125}\text{Te}/^{128}\text{Te}$  to be 0.22204 using exponential law.

<sup>a</sup> Subscript of "N" represents the results relative to normalised standard.
